# Supplementary material
Source: PubMed Central journal article supplement (PMC4534471)
Supplement: 14_203_Li_Suppl.pdf [file 14_203_Li_Suppl.pdf]

Supplemental Data

Piwi-Interacting RNAs (piRNAs) Are Dysregulated in Renal Cell Carcinoma and Associated with Tumor Metastasis and Cancer-Specific Survival

Yuping Li,<sup>1,2\*</sup> Xiwei Wu,<sup>3\*</sup> Hanlin Gao,<sup>1\*</sup> Jennifer M Jin,<sup>1\*</sup> Arthur X Li,<sup>4</sup> Young S Kim,<sup>1</sup> Sumanta K Pal,<sup>5</sup> Rebecca A Nelson,<sup>4</sup> Clayton M Lau,<sup>6</sup> Chao Guo,<sup>1</sup> Bing Mu,<sup>3</sup> Jinhui Wang,<sup>3</sup> Frances Wang,<sup>1</sup> Jessica Wang,<sup>1</sup> Yuanyin Zhao,<sup>2</sup> Wengang Chen,<sup>1</sup> John J Rossi,<sup>3</sup> Lawrence M Weiss,<sup>1</sup> and Huiqing Wu<sup>1</sup>

Online address: <http://www.molmed.org>

The Feinstein Institute for Medical Research  
North Shore LIJ  
Empowering Imagination. Pioneering Discovery.®

Supplementary Table S1. Small non-coding RNAs identified in the 24 frozen clear cell renal cell carcinoma (ccRCC) and benign kidney tissue samples by small RNA deep sequencing

| Sample | Total    | miRNA              | misc_RNA      | Mt-tRNA         | rRNA            | scRNA            | snoRNA            | snRNA          | tRNA              | Refseq            | Intergenic        |
|--------|----------|--------------------|---------------|-----------------|-----------------|------------------|-------------------|----------------|-------------------|-------------------|-------------------|
| E1     | 11317164 | 6450586<br>57.00%  | 2400<br>0.02% | 42576<br>0.38%  | 232934<br>2.06% | 23096<br>0.20%   | 1321286<br>11.68% | 9688<br>0.09%  | 390659<br>3.45%   | 1369785<br>12.10% | 1474154<br>13.03% |
| E2     | 12348778 | 7276836<br>58.93%  | 2792<br>0.02% | 16135<br>0.13%  | 251765<br>2.04% | 17219<br>0.14%   | 2028350<br>16.43% | 5153<br>0.04%  | 304406<br>2.47%   | 1229524<br>9.96%  | 1216598<br>9.85%  |
| E3     | 11842910 | 5622356<br>47.47%  | 4265<br>0.04% | 29297<br>0.25%  | 253121<br>2.14% | 41592<br>0.35%   | 1147233<br>9.69%  | 21856<br>0.18% | 1475852<br>12.46% | 1516992<br>12.81% | 1730346<br>14.61% |
| E4     | 7196921  | 4383195<br>60.90%  | 1554<br>0.02% | 10084<br>0.14%  | 184920<br>2.57% | 11755<br>0.16%   | 1063412<br>14.78% | 4952<br>0.07%  | 792229<br>11.01%  | 448212<br>6.23%   | 296608<br>4.12%   |
| E5     | 14135897 | 10426136<br>73.76% | 3969<br>0.03% | 30868<br>0.22%  | 162702<br>1.15% | 29115<br>0.21%   | 1395982<br>9.88%  | 4570<br>0.03%  | 293164<br>2.07%   | 858193<br>6.07%   | 931198<br>6.59%   |
| E6     | 12194121 | 7543398<br>61.86%  | 4609<br>0.04% | 19858<br>0.16%  | 151547<br>1.24% | 40426<br>0.33%   | 1078660<br>8.85%  | 7241<br>0.06%  | 1754657<br>14.39% | 848836<br>6.96%   | 744889<br>6.11%   |
| L12    | 9805446  | 5075074<br>51.76%  | 2296<br>0.02% | 30367<br>0.31%  | 227757<br>2.32% | 13808<br>0.14%   | 1466294<br>14.95% | 7299<br>0.07%  | 273901<br>2.79%   | 1254994<br>12.80% | 1453656<br>14.82% |
| L13    | 11453799 | 6275429<br>54.79%  | 2711<br>0.02% | 21524<br>0.19%  | 259313<br>2.26% | 15928<br>0.14%   | 1602785<br>13.99% | 6060<br>0.05%  | 351961<br>3.07%   | 1400664<br>12.23% | 1517424<br>13.25% |
| L31    | 10477290 | 4541040<br>43.34%  | 2939<br>0.03% | 39414<br>0.38%  | 224974<br>2.15% | 15713<br>0.15%   | 2111898<br>20.16% | 4330<br>0.04%  | 393487<br>3.76%   | 1547511<br>14.77% | 1595984<br>15.23% |
| L7     | 11773145 | 6082814<br>51.67%  | 2711<br>0.02% | 21702<br>0.18%  | 303271<br>2.58% | 29052<br>0.25%   | 1954010<br>16.60% | 9422<br>0.08%  | 734393<br>6.24%   | 1297017<br>11.02% | 1338753<br>11.37% |
| L89-2  | 13720736 | 8544832<br>62.28%  | 3457<br>0.03% | 14676<br>0.11%  | 149554<br>1.09% | 37836<br>0.28%   | 1269650<br>9.25%  | 5541<br>0.04%  | 2004400<br>14.61% | 849165<br>6.19%   | 841625<br>6.13%   |
| L91-2  | 13607239 | 9234862<br>67.87%  | 3417<br>0.03% | 47215<br>0.35%  | 148197<br>1.09% | 29672<br>0.22%   | 1384476<br>10.17% | 5862<br>0.04%  | 1214904<br>8.93%  | 814704<br>5.99%   | 723930<br>5.32%   |
| M13    | 14481545 | 7105932<br>49.07%  | 4630<br>0.03% | 250679<br>1.73% | 837363<br>5.78% | 176763<br>1.22%  | 1314899<br>9.08%  | 80552<br>0.56% | 1005208<br>6.94%  | 1721959<br>11.89% | 1983560<br>13.70% |
| M16    | 10099853 | 5654945<br>55.99%  | 2113<br>0.02% | 29972<br>0.30%  | 222314<br>2.20% | 17842<br>0.18%   | 1263043<br>12.51% | 5649<br>0.06%  | 635713<br>6.29%   | 1063291<br>10.53% | 1204971<br>11.93% |
| M22    | 10819963 | 4430305<br>40.95%  | 3633<br>0.03% | 122065<br>1.13% | 417678<br>3.86% | revised<br>0.39% | 1547611<br>14.30% | 47187<br>0.44% | 1332986<br>12.32% | 1502701<br>13.89% | 1373377<br>12.69% |
| M2s_7  | 12519544 | 9074057<br>72.48%  | 4824<br>0.04% | 19308<br>0.15%  | 221929<br>1.77% | 70615<br>0.56%   | 848412<br>6.78%   | 15642<br>0.12% | 829892<br>6.63%   | 733539<br>5.86%   | 701326<br>5.60%   |
| M3     | 12255959 | 5039412<br>41.12%  | 4034<br>0.03% | 44323<br>0.36%  | 419416<br>3.42% | 22849<br>0.19%   | 2433461<br>19.86% | 20769<br>0.17% | 1253441<br>10.23% | 1487377<br>12.14% | 1530877<br>12.49% |
| M4     | 10751495 | 4565724<br>42.47%  | 5487<br>0.05% | 21693<br>0.20%  | 734837<br>6.83% | 47374<br>0.44%   | 1744374<br>16.22% | 40804<br>0.38% | 906273<br>8.43%   | 1358735<br>12.64% | 1326194<br>12.33% |
| N17_2  | 9928884  | 4670837<br>47.04%  | 4185<br>0.04% | 182272<br>1.84% | 325438<br>3.28% | 16051<br>0.16%   | 1102469<br>11.10% | 6498<br>0.07%  | 950148<br>9.57%   | 1204850<br>12.13% | 1466136<br>14.77% |
| N18    | 11587478 | 6879221<br>59.37%  | 2186<br>0.02% | 44149<br>0.38%  | 259858<br>2.24% | 17609<br>0.15%   | 1619260<br>13.97% | 5340<br>0.05%  | 339229<br>2.93%   | 1188912<br>10.26% | 1231714<br>10.63% |
| N27    | 14109222 | 7630832<br>54.08%  | 7344<br>0.05% | 448096<br>3.18% | 377784<br>2.68% | 59811<br>0.42%   | 1203412<br>8.53%  | 26059<br>0.18% | 1222740<br>8.67%  | 1532257<br>10.86% | 1600887<br>11.35% |
| N4_2   | 11055320 | 5194064<br>46.98%  | 4646<br>0.04% | 433173<br>3.92% | 432874<br>3.92% | 29406<br>0.27%   | 1327382<br>12.01% | 11116<br>0.10% | 1353451<br>12.24% | 1056282<br>9.55%  | 1212926<br>10.97% |
| N43s_6 | 14433619 | 9263665<br>64.18%  | 3341<br>0.02% | 202447<br>1.40% | 234613<br>1.63% | 30842<br>0.21%   | 1113223<br>7.71%  | 11958<br>0.08% | 1020800<br>7.07%  | 1170662<br>8.11%  | 1382068<br>9.58%  |
| N7     | 11522012 | 5566192<br>48.31%  | 2355<br>0.02% | 51507<br>0.45%  | 252316<br>2.19% | 19603<br>0.17%   | 1991129<br>17.28% | 7574<br>0.07%  | 753437<br>6.54%   | 1393932<br>12.10% | 1483967<br>12.88% |

Note: N - benign kidney tissue, L - localized ccRCC, E - locally extensive ccRCC, and M - metastatic ccRCC.

Supplementary Table S2. piRNAs present in human kidney tissue ( $\geq 2$  copies in  $\geq 1$  specimen).

| ID (fRNAdb)         | ID (fRNAdb)         | ID (fRNAdb)                   |
|---------------------|---------------------|-------------------------------|
| FR000693   DQ598951 | FR136623   DQ588038 | FR276112   DQ598263           |
| FR000712   DQ570709 | FR138938   DQ582496 | FR277293   DQ580073           |
| FR001852   DQ575780 | FR139742   DQ562105 | FR277415   DQ570251           |
| FR002033   DQ589813 | FR139996   DQ571510 | FR277886   DQ597997           |
| FR002163   DQ540059 | FR140284   DQ572471 | FR279346   DQ614080           |
| FR002464   DQ575737 | FR140316   DQ600951 | FR279492   DQ573486           |
| FR002561   DQ588139 | FR140406   DQ545177 | FR279668   DQ571955           |
| FR002762   DQ596993 | FR140544   DQ598155 | FR280088   DQ620162           |
| FR002829   DQ594273 | FR140858   DQ598918 | FR280178   DQ581730           |
| FR002985   DQ577762 | FR141147   DQ575659 | FR281337   DQ577356           |
| FR003004   DQ574112 | FR141649   DQ587683 | FR282830   DQ576605           |
| FR003107   DQ603505 | FR142387   DQ592146 | FR283205   DQ578806           |
| FR003380   DQ588779 | FR143826   DQ593902 | FR283336   DQ580105           |
| FR003452   DQ592181 | FR143879   DQ575064 | FR283482   DQ592932           |
| FR003773   DQ596216 | FR144607   DQ597217 | FR284128   DQ587402           |
| FR003837   DQ586845 | FR145409   DQ548430 | FR284383   DQ572866           |
| FR004248   DQ583196 | FR145575   DQ593671 | FR284470   DQ578998           |
| FR004416   DQ597789 | FR148018   DQ586986 | FR285104   DQ575674           |
| FR004819   DQ596390 | FR148093   DQ575658 | FR285641   DQ561146, DQ686825 |
| FR004941   DQ614030 | FR148700   DQ588409 | FR286043   DQ590181           |
| FR005466   DQ574643 | FR149081   DQ569743 | FR286916   DQ577289           |
| FR005545   DQ573381 | FR149623   DQ583324 | FR288740   DQ580441           |
| FR005754   DQ571550 | FR150573   DQ596276 | FR288759   DQ596918           |
| FR006200   DQ587229 | FR151056   DQ581932 | FR289017   DQ578455           |
| FR006319   DQ598252 | FR151135   DQ601415 | FR289542   DQ570991           |
| FR006344   DQ600056 | FR151189   DQ561416 | FR289742   DQ586682           |
| FR006353   DQ571419 | FR151276   DQ577359 | FR289805   DQ579077           |
| FR006585   DQ587608 | FR151677   DQ598190 | FR290142   DQ581967           |
| FR006784   DQ578488 | FR151742   DQ585776 | FR290621   DQ577942           |
| FR006894   DQ596587 | FR152253   DQ598180 | FR291339   DQ596468           |
| FR006950   DQ585854 | FR152361   DQ588804 | FR291347   DQ604838           |
| FR007153   DQ590547 | FR152601   DQ550741 | FR291502   DQ598183, DQ614412 |
| FR007267   DQ597968 | FR152981   DQ577244 | FR291543   DQ598189           |
| FR007639   DQ596863 | FR153009   DQ590798 | FR291741   DQ540975           |
| FR007766   DQ575883 | FR153085   DQ581944 | FR291861   DQ590020           |
| FR007806   DQ542907 | FR153306   DQ614340 | FR291903   DQ571387           |
| FR008494   DQ586183 | FR153574   DQ587060 | FR291929   DQ618191           |
| FR008504   DQ573352 | FR155758   DQ578878 | FR292411   DQ586492           |
| FR008766   DQ576942 | FR156205   DQ596386 | FR292606   DQ590704           |
| FR008939   DQ596932 | FR156923   DQ599118 | FR293713   DQ596155           |
| FR008963   DQ588039 | FR157250   DQ579864 | FR294249   DQ598593           |
| FR009639   DQ598409 | FR157436   DQ582953 | FR294663   DQ594851           |
| FR009740   DQ571697 | FR157961   DQ590642 | FR295156   DQ567581           |
| FR009882   DQ596723 | FR158262   DQ593292 | FR295665   DQ593656           |
| FR010071   DQ614031 | FR158750   DQ548138 | FR295687   DQ597971           |
| FR011414   DQ578057 | FR159422   DQ596701 | FR295879   DQ599822           |
| FR012087   DQ583313 | FR160545   DQ579497 | FR295924   DQ593737           |
| FR012473   DQ583674 | FR160571   DQ593736 | FR296333   DQ705481           |
| FR012889   DQ589240 | FR161271   DQ579145 | FR297613   DQ593414           |
| FR012927   DQ604839 | FR162073   DQ584905 | FR297745   DQ587344           |
| FR013040   DQ593888 | FR162144   DQ570994 | FR298686   DQ578516           |
| FR013124   DQ595533 | FR162162   DQ614088 | FR298737   DQ596603           |
| FR013443   DQ578235 | FR162235   DQ596267 | FR298757   DQ596310           |
| FR013676   DQ598431 | FR163199   DQ582536 | FR298884   DQ575746           |
| FR014739   DQ747893 | FR163245   DQ596081 | FR300197   DQ576893           |
| FR015103   DQ573323 | FR163506   DQ571823 | FR300684   DQ570772           |
| FR015567   DQ571874 | FR164361   DQ579412 | FR300709   DQ588249           |
| FR015896   DQ595336 | FR165524   DQ593501 | FR300770   DQ600436           |
| FR016040   DQ578882 | FR165691   DQ541194 | FR300992   DQ604304           |
| FR016379   DQ617348 | FR165905   DQ576200 | FR301102   DQ572865           |
| FR016773   DQ570698 | FR166288   DQ593830 | FR301191   DQ593398           |
| FR017516   DQ593751 | FR166689   DQ598176 | FR301314   DQ597692           |
| FR018916   DQ597887 | FR167222   DQ585261 | FR301799   DQ577752           |
| FR019019   DQ598651 | FR167251   DQ588836 | FR301816   DQ591593           |
| FR019274   DQ591089 | FR168299   DQ575660 | FR301889   DQ579193           |
| FR019385   DQ576880 | FR171578   DQ590492 | FR301922   DQ576233           |
| FR019631   DQ598676 | FR171590   DQ614549 | FR302308   DQ587028           |
| FR019775   DQ590064 | FR171863   DQ597687 | FR302393   DQ591847           |
| FR020052   DQ597402 | FR172647   DQ592383 | FR302680   DQ598084           |
| FR020155   DQ593089 | FR172967   DQ602351 | FR304061   DQ587969           |
| FR020635   DQ579821 | FR174852   DQ588594 | FR304116   DQ595575           |
| FR021056   DQ571029 | FR175137   DQ588166 | FR304775   DQ598029           |
| FR022075   DQ590407 | FR175225   DQ595422 | FR305237   DQ591872           |
| FR022849   DQ593431 | FR175260   DQ596602 | FR305295   DQ592931           |

Continued on next page

Supplementary Table S2. *Continued.*

|          |  |                    |          |  |                    |          |  |                    |
|----------|--|--------------------|----------|--|--------------------|----------|--|--------------------|
| FR023255 |  | DQ576780           | FR175370 |  | DQ585093           | FR305647 |  | DQ595276           |
| FR023693 |  | DQ582175           | FR175402 |  | DQ584635           | FR306048 |  | DQ583334           |
| FR024063 |  | DQ577771           | FR175406 |  | DQ573999           | FR306737 |  | DQ604844           |
| FR024357 |  | DQ593423           | FR175613 |  | DQ585051           | FR307060 |  | DQ603015           |
| FR024428 |  | DQ575488           | FR175679 |  | DQ733978           | FR307504 |  | DQ590190           |
| FR025266 |  | DQ571949           | FR175868 |  | DQ578550           | FR308866 |  | DQ582219           |
| FR025321 |  | DQ593636           | FR176176 |  | DQ594464           | FR309141 |  | DQ590027           |
| FR025659 |  | DQ578353           | FR176219 |  | DQ584386           | FR309514 |  | DQ593039           |
| FR025783 |  | DQ599651           | FR177805 |  | DQ603848           | FR309588 |  | DQ577731           |
| FR026037 |  | DQ571549           | FR177847 |  | DQ561145, DQ724095 | FR309811 |  | DQ596309           |
| FR026093 |  | DQ725273           | FR178390 |  | DQ599854           | FR309866 |  | DQ601622           |
| FR026803 |  | DQ572561           | FR179134 |  | DQ573489           | FR309896 |  | DQ570909           |
| FR026913 |  | DQ596670           | FR179692 |  | DQ550742           | FR309900 |  | DQ585194           |
| FR027151 |  | DQ540412           | FR179784 |  | DQ571003           | FR310126 |  | DQ598445           |
| FR027774 |  | DQ595535           | FR180098 |  | DQ582036           | FR310249 |  | DQ576966           |
| FR028698 |  | DQ596354           | FR180246 |  | DQ578983           | FR310293 |  | DQ595186           |
| FR029116 |  | DQ596931           | FR180388 |  | DQ614633           | FR310674 |  | DQ570219           |
| FR029363 |  | DQ561111           | FR180416 |  | DQ734051           | FR310766 |  | DQ599636           |
| FR029743 |  | DQ593332           | FR180753 |  | DQ594989           | FR311241 |  | DQ598039           |
| FR030135 |  | DQ574254           | FR181539 |  | DQ614334           | FR312077 |  | DQ623540           |
| FR031235 |  | DQ586528           | FR183160 |  | DQ585095           | FR312123 |  | DQ598072           |
| FR031496 |  | DQ590386           | FR183841 |  | DQ548429           | FR312365 |  | DQ593356           |
| FR031587 |  | DQ598008           | FR184142 |  | DQ596311           | FR313154 |  | DQ600994           |
| FR032082 |  | DQ600431           | FR184152 |  | DQ599058           | FR313338 |  | DQ581851           |
| FR033142 |  | DQ596080           | FR184567 |  | DQ591997           | FR313859 |  | DQ573706           |
| FR033947 |  | DQ576941           | FR184831 |  | DQ579570           | FR314418 |  | DQ541113           |
| FR034072 |  | DQ575742           | FR185447 |  | DQ585266           | FR314437 |  | DQ589995           |
| FR034642 |  | DQ593433           | FR185905 |  | DQ572870           | FR314551 |  | DQ590649           |
| FR035643 |  | DQ597482           | FR188232 |  | DQ597970           | FR314589 |  | DQ582827           |
| FR036067 |  | DQ573682           | FR188731 |  | DQ590938           | FR314987 |  | DQ586741           |
| FR036302 |  | DQ601954           | FR189137 |  | DQ599019           | FR316975 |  | DQ590031           |
| FR036351 |  | DQ614087           | FR189860 |  | DQ599410           | FR318437 |  | DQ594856           |
| FR036424 |  | DQ584177           | FR189991 |  | DQ714439           | FR319300 |  | DQ598650           |
| FR037393 |  | DQ584568           | FR190481 |  | DQ594453           | FR319444 |  | DQ597340           |
| FR037893 |  | DQ596877           | FR190502 |  | DQ580106           | FR319465 |  | DQ703900           |
| FR038165 |  | DQ584697           | FR190713 |  | DQ575881           | FR319486 |  | DQ571526           |
| FR039384 |  | DQ593052           | FR190827 |  | DQ571335           | FR319561 |  | DQ589203           |
| FR041176 |  | DQ570392           | FR192541 |  | DQ571994           | FR319802 |  | DQ577259           |
| FR041739 |  | DQ597344           | FR192676 |  | DQ582567           | FR319972 |  | DQ729366           |
| FR042342 |  | DQ592114           | FR193008 |  | DQ588380           | FR320096 |  | DQ588128           |
| FR042401 |  | DQ587970           | FR193490 |  | DQ575656           | FR320464 |  | DQ752157           |
| FR043670 |  | DQ590013           | FR193610 |  | DQ579263           | FR321707 |  | DQ571378           |
| FR044509 |  | DQ597688           | FR193711 |  | DQ574207           | FR322380 |  | DQ603601           |
| FR044708 |  | DQ620053           | FR193908 |  | DQ596738           | FR323022 |  | DQ593311           |
| FR046926 |  | DQ580130           | FR195446 |  | DQ573487           | FR324156 |  | DQ600266           |
| FR047293 |  | DQ570344           | FR196915 |  | DQ614101           | FR324515 |  | DQ597218           |
| FR048266 |  | DQ586493           | FR197104 |  | DQ601526           | FR324839 |  | DQ582242           |
| FR048753 |  | DQ588866           | FR197360 |  | DQ600952           | FR325161 |  | DQ539926           |
| FR048835 |  | DQ582531           | FR197507 |  | DQ594917           | FR325429 |  | DQ592148           |
| FR050070 |  | DQ572382           | FR197620 |  | DQ558403           | FR325461 |  | DQ576095           |
| FR050780 |  | DQ590028           | FR198019 |  | DQ581965           | FR325897 |  | DQ593158           |
| FR051200 |  | DQ614419           | FR198023 |  | DQ611325           | FR326119 |  | DQ593752           |
| FR051519 |  | DQ582231           | FR198390 |  | DQ753514           | FR326304 |  | DQ597539           |
| FR051660 |  | DQ540915           | FR198952 |  | DQ594465           | FR326603 |  | DQ574484           |
| FR052592 |  | DQ593569           | FR199370 |  | DQ576918           | FR326924 |  | DQ593015           |
| FR052968 |  | DQ596307           | FR199787 |  | DQ598068           | FR327232 |  | DQ712837           |
| FR052969 |  | DQ590029           | FR201552 |  | DQ540976           | FR327316 |  | DQ591388           |
| FR053025 |  | DQ577753           | FR201690 |  | DQ591481           | FR327685 |  | DQ571031           |
| FR053492 |  | DQ596239           | FR201737 |  | DQ586894           | FR327765 |  | DQ574723           |
| FR053545 |  | DQ576900           | FR202159 |  | DQ608296           | FR328666 |  | DQ575132           |
| FR054350 |  | DQ582098           | FR203545 |  | DQ596183           | FR328809 |  | DQ595098           |
| FR054474 |  | DQ577132           | FR204013 |  | DQ579255           | FR329966 |  | DQ578783           |
| FR055135 |  | DQ575985           | FR204697 |  | DQ581538           | FR331382 |  | DQ597693           |
| FR055322 |  | DQ600644           | FR205116 |  | DQ597397           | FR331389 |  | DQ597396           |
| FR055395 |  | DQ582311           | FR205579 |  | DQ598649           | FR331595 |  | DQ573654           |
| FR056876 |  | DQ581178           | FR205597 |  | DQ576877           | FR331646 |  | DQ597973, DQ614338 |
| FR057035 |  | DQ581604           | FR205670 |  | DQ585138           | FR331965 |  | DQ596250           |
| FR057472 |  | DQ598891           | FR205856 |  | DQ583358           | FR332156 |  | DQ592938           |
| FR060041 |  | DQ596314           | FR206006 |  | DQ571875           | FR332476 |  | DQ587963           |
| FR060372 |  | DQ586011           | FR206288 |  | DQ591440           | FR335070 |  | DQ593260           |
| FR061209 |  | DQ540966, DQ603342 | FR206292 |  | DQ573407           | FR335215 |  | DQ572868           |
| FR061350 |  | DQ600689           | FR206349 |  | DQ584155           | FR335347 |  | DQ614091           |
| FR061721 |  | DQ593232           | FR206625 |  | DQ604302           | FR337050 |  | DQ581623           |
| FR061877 |  | DQ571000           | FR207412 |  | DQ600186           | FR337521 |  | DQ598893           |
| FR061914 |  | DQ576923           | FR208151 |  | DQ614106           | FR337552 |  | DQ596542           |
| FR061996 |  | DQ574355           | FR208512 |  | DQ598181           | FR337554 |  | DQ588143           |

*Continued on next page*

Supplementary Table S2. Continued.

|          |  |                   |          |  |          |          |  |          |
|----------|--|-------------------|----------|--|----------|----------|--|----------|
| FR062594 |  | DQ571152          | FR208773 |  | DQ580272 | FR337639 |  | DQ546549 |
| FR062891 |  | DQ597346,DQ614094 | FR209216 |  | DQ574852 | FR337999 |  | DQ571388 |
| FR063016 |  | DQ590548          | FR210409 |  | DQ581031 | FR338284 |  | DQ595699 |
| FR063151 |  | DQ601447          | FR210634 |  | DQ593900 | FR338565 |  | DQ585088 |
| FR063153 |  | DQ573883          | FR210836 |  | DQ599029 | FR338575 |  | DQ585628 |
| FR063224 |  | DQ600515          | FR211132 |  | DQ597403 | FR338747 |  | DQ584698 |
| FR063430 |  | DQ573768          | FR211529 |  | DQ602350 | FR340149 |  | DQ598164 |
| FR063901 |  | DQ590830          | FR212850 |  | DQ594126 | FR341449 |  | DQ601417 |
| FR064000 |  | DQ593767          | FR213332 |  | DQ591357 | FR341694 |  | DQ571591 |
| FR064142 |  | DQ599711          | FR213383 |  | DQ598648 | FR341794 |  | DQ571333 |
| FR065160 |  | DQ580405          | FR213473 |  | DQ570956 | FR341816 |  | DQ593408 |
| FR065443 |  | DQ621129          | FR213966 |  | DQ599929 | FR342067 |  | DQ599147 |
| FR066510 |  | DQ574391          | FR214430 |  | DQ585769 | FR342779 |  | DQ598159 |
| FR066533 |  | DQ573232          | FR214686 |  | DQ598188 | FR343221 |  | DQ583578 |
| FR066556 |  | DQ586402          | FR215268 |  | DQ603175 | FR343715 |  | DQ601051 |
| FR066581 |  | DQ597345,DQ614093 | FR215298 |  | DQ571133 | FR344151 |  | DQ578886 |
| FR066864 |  | DQ588410          | FR215829 |  | DQ596598 | FR344274 |  | DQ601107 |
| FR067047 |  | DQ564758          | FR216217 |  | DQ577288 | FR344796 |  | DQ593538 |
| FR067977 |  | DQ596392          | FR216262 |  | DQ599116 | FR345139 |  | DQ579007 |
| FR068012 |  | DQ591244          | FR217254 |  | DQ585094 | FR345549 |  | DQ575839 |
| FR068294 |  | DQ614086          | FR217647 |  | DQ596361 | FR346005 |  | DQ599922 |
| FR069485 |  | DQ540526          | FR217724 |  | DQ586921 | FR346379 |  | DQ582527 |
| FR070873 |  | DQ582731          | FR217801 |  | DQ582264 | FR346589 |  | DQ601267 |
| FR071598 |  | DQ570394          | FR217841 |  | DQ591888 | FR346940 |  | DQ594753 |
| FR071685 |  | DQ582588          | FR217875 |  | DQ572002 | FR347243 |  | DQ581663 |
| FR072386 |  | DQ581032          | FR218180 |  | DQ601060 | FR347623 |  | DQ601914 |
| FR073001 |  | DQ580006          | FR218323 |  | DQ596615 | FR347836 |  | DQ600112 |
| FR073364 |  | DQ598175          | FR218523 |  | DQ570687 | FR348178 |  | DQ596470 |
| FR073609 |  | DQ570963          | FR218589 |  | DQ579049 | FR348194 |  | DQ600446 |
| FR073756 |  | DQ553409          | FR218973 |  | DQ598378 | FR348209 |  | DQ602401 |
| FR073949 |  | DQ588925          | FR219510 |  | DQ595539 | FR348365 |  | DQ593909 |
| FR074386 |  | DQ571650          | FR220491 |  | DQ600075 | FR349959 |  | DQ593415 |
| FR074449 |  | DQ700823          | FR220497 |  | DQ593109 | FR349977 |  | DQ580947 |
| FR075316 |  | DQ570540          | FR221242 |  | DQ576348 | FR350125 |  | DQ577119 |
| FR075972 |  | DQ599939          | FR221583 |  | DQ586108 | FR350128 |  | DQ581788 |
| FR076309 |  | DQ600312          | FR222189 |  | DQ591787 | FR350412 |  | DQ597347 |
| FR077031 |  | DQ574253          | FR222326 |  | DQ597945 | FR351180 |  | DQ598177 |
| FR077132 |  | DQ597974,DQ614339 | FR222322 |  | DQ574138 | FR351329 |  | DQ598619 |
| FR077158 |  | DQ547181          | FR223633 |  | DQ579836 | FR351975 |  | DQ594285 |
| FR077183 |  | DQ576894          | FR223921 |  | DQ577620 | FR352491 |  | DQ571849 |
| FR077664 |  | DQ600289          | FR224151 |  | DQ577008 | FR353474 |  | DQ596313 |
| FR078025 |  | DQ586410          | FR224235 |  | DQ600288 | FR354600 |  | DQ588403 |
| FR078880 |  | DQ571873          | FR224266 |  | DQ600537 | FR356011 |  | DQ587568 |
| FR079580 |  | DQ596025          | FR225428 |  | DQ575740 | FR356087 |  | DQ584490 |
| FR080741 |  | DQ541218          | FR225506 |  | DQ580666 | FR356791 |  | DQ597215 |
| FR081273 |  | DQ597109          | FR227501 |  | DQ590404 | FR357171 |  | DQ578787 |
| FR081589 |  | DQ598182,DQ614411 | FR227782 |  | DQ571525 | FR357437 |  | DQ603364 |
| FR082126 |  | DQ570110          | FR228545 |  | DQ598645 | FR359148 |  | DQ593574 |
| FR082269 |  | DQ598675          | FR229439 |  | DQ587031 | FR359219 |  | DQ580573 |
| FR082823 |  | DQ597156          | FR229800 |  | DQ597216 | FR360874 |  | DQ573293 |
| FR083087 |  | DQ600514          | FR229852 |  | DQ580437 | FR360876 |  | DQ596992 |
| FR083403 |  | DQ589662          | FR230448 |  | DQ593305 | FR360931 |  | DQ580826 |
| FR083488 |  | DQ576917          | FR230731 |  | DQ597990 | FR361928 |  | DQ584704 |
| FR084131 |  | DQ593358          | FR230867 |  | DQ595661 | FR362608 |  | DQ596371 |
| FR086093 |  | DQ577346          | FR231373 |  | DQ571812 | FR363051 |  | DQ574074 |
| FR086322 |  | DQ540403          | FR231667 |  | DQ570043 | FR363279 |  | DQ595272 |
| FR086631 |  | DQ594924          | FR233507 |  | DQ597341 | FR363475 |  | DQ588632 |
| FR086978 |  | DQ599849          | FR233730 |  | DQ598103 | FR365501 |  | DQ597483 |
| FR087175 |  | DQ597691          | FR234258 |  | DQ597113 | FR365646 |  | DQ570206 |
| FR087562 |  | DQ573370          | FR235453 |  | DQ578464 | FR366006 |  | DQ576604 |
| FR087856 |  | DQ577145          | FR235503 |  | DQ598677 | FR366023 |  | DQ593719 |
| FR087898 |  | DQ581533          | FR235893 |  | DQ614335 | FR366450 |  | DQ579297 |
| FR088823 |  | DQ594740          | FR236484 |  | DQ598646 | FR367546 |  | DQ596098 |
| FR089006 |  | DQ602402          | FR236999 |  | DQ587269 | FR367806 |  | DQ584308 |
| FR089038 |  | DQ586027          | FR237180 |  | DQ598647 | FR367839 |  | DQ603346 |
| FR089191 |  | DQ572644          | FR237571 |  | DQ570669 | FR368511 |  | DQ571425 |
| FR089318 |  | DQ597477          | FR237782 |  | DQ540780 | FR368841 |  | DQ584428 |
| FR090237 |  | DQ589301          | FR237904 |  | DQ589231 | FR369104 |  | DQ595536 |
| FR090523 |  | DQ583144          | FR238318 |  | DQ590854 | FR369309 |  | DQ590323 |
| FR090905 |  | DQ597484          | FR239429 |  | DQ597975 | FR369664 |  | DQ602429 |
| FR090926 |  | DQ593325          | FR239932 |  | DQ577347 | FR369768 |  | DQ590328 |
| FR091703 |  | DQ585510          | FR240050 |  | DQ585195 | FR369981 |  | DQ598069 |
| FR092065 |  | DQ577772          | FR240375 |  | DQ570968 | FR370106 |  | DQ579936 |
| FR092662 |  | DQ598016          | FR240492 |  | DQ583274 | FR370156 |  | DQ621833 |
| FR092676 |  | DQ591627          | FR240986 |  | DQ577423 | FR370913 |  | DQ595210 |
| FR095358 |  | DQ614632          | FR241189 |  | DQ600880 | FR371613 |  | DQ614029 |

Continued on next page

Supplementary Table S2. *Continued.*

|          |          |          |          |          |          |
|----------|----------|----------|----------|----------|----------|
| FR095983 | DQ571941 | FR241314 | DQ573380 | FR371957 | DQ599989 |
| FR095996 | DQ588412 | FR242050 | DQ573998 | FR372135 | DQ598130 |
| FR097339 | DQ596699 | FR242268 | DQ590727 | FR372219 | DQ599117 |
| FR097360 | DQ576094 | FR243113 | DQ595517 | FR372317 | DQ578846 |
| FR097506 | DQ579020 | FR243174 | DQ583325 | FR372325 | DQ584197 |
| FR097576 | DQ600238 | FR243435 | DQ601766 | FR372373 | DQ595534 |
| FR098169 | DQ590023 | FR243591 | DQ598349 | FR372795 | DQ604837 |
| FR098445 | DQ614626 | FR243752 | DQ601548 | FR373279 | DQ571932 |
| FR098556 | DQ585326 | FR244432 | DQ598641 | FR374375 | DQ596027 |
| FR098579 | DQ593537 | FR245310 | DQ596225 | FR374932 | DQ589292 |
| FR099055 | DQ580999 | FR245521 | DQ585386 | FR375009 | DQ598187 |
| FR099576 | DQ587133 | FR245786 | DQ599906 | FR375459 | DQ575884 |
| FR100898 | DQ573287 | FR245842 | DQ572350 | FR375671 | DQ588867 |
| FR102402 | DQ586098 | FR246359 | DQ587117 | FR376193 | DQ596830 |
| FR103385 | DQ590853 | FR246367 | DQ571500 | FR376321 | DQ597960 |
| FR103462 | DQ569993 | FR246461 | DQ575036 | FR376987 | DQ588579 |
| FR103600 | DQ570393 | FR246663 | DQ595444 | FR377519 | DQ581539 |
| FR105027 | DQ571589 | FR247404 | DQ599192 | FR377701 | DQ575899 |
| FR106075 | DQ573593 | FR247930 | DQ596469 | FR377981 | DQ604305 |
| FR106241 | DQ590226 | FR248000 | DQ571858 | FR378652 | DQ598312 |
| FR106521 | DQ744269 | FR248540 | DQ572205 | FR378894 | DQ598040 |
| FR107338 | DQ598592 | FR248964 | DQ593191 | FR380004 | DQ581894 |
| FR107415 | DQ571195 | FR249489 | DQ614089 | FR380227 | DQ594556 |
| FR107946 | DQ606544 | FR249598 | DQ586830 | FR380254 | DQ573062 |
| FR108153 | DQ599622 | FR249679 | DQ595023 | FR380286 | DQ570728 |
| FR108660 | DQ723091 | FR250127 | DQ571947 | FR380890 | DQ579896 |
| FR109483 | DQ602030 | FR250550 | DQ583434 | FR381029 | DQ590959 |
| FR109947 | DQ570044 | FR250732 | DQ580261 | FR381169 | DQ595899 |
| FR110343 | DQ570133 | FR252389 | DQ596538 | FR381182 | DQ581351 |
| FR110995 | DQ590835 | FR252722 | DQ589280 | FR381287 | DQ588397 |
| FR111363 | DQ597400 | FR253758 | DQ591233 | FR383421 | DQ570940 |
| FR111727 | DQ596805 | FR254689 | DQ586573 | FR383469 | DQ598515 |
| FR111751 | DQ586320 | FR254892 | DQ574111 | FR384319 | DQ580445 |
| FR111771 | DQ580097 | FR255141 | DQ572892 | FR384981 | DQ551040 |
| FR111982 | DQ584569 | FR255604 | DQ575741 | FR385812 | DQ593621 |
| FR112044 | DQ595584 | FR255810 | DQ574993 | FR386792 | DQ581964 |
| FR113066 | DQ541777 | FR255857 | DQ599362 | FR387120 | DQ580273 |
| FR114004 | DQ595807 | FR257157 | DQ581943 | FR387950 | DQ598167 |
| FR114547 | DQ591243 | FR257287 | DQ578832 | FR388151 | DQ572216 |
| FR115079 | DQ598452 | FR258764 | DQ591143 | FR389125 | DQ586848 |
| FR115237 | DQ592185 | FR259027 | DQ597401 | FR389350 | DQ597221 |
| FR115418 | DQ592147 | FR259053 | DQ580854 | FR389425 | DQ570992 |
| FR116373 | DQ580188 | FR259362 | DQ587514 | FR389719 | DQ591030 |
| FR116390 | DQ577470 | FR259693 | DQ590665 | FR389996 | DQ591196 |
| FR117058 | DQ540280 | FR260321 | DQ580590 | FR390438 | DQ595836 |
| FR117771 | DQ574163 | FR260426 | DQ576892 | FR390460 | DQ588101 |
| FR118208 | DQ626326 | FR261794 | DQ590030 | FR390574 | DQ627543 |
| FR118379 | DQ571538 | FR263001 | DQ591044 | FR390588 | DQ599818 |
| FR118581 | DQ588015 | FR263507 | DQ589140 | FR390833 | DQ582189 |
| FR119842 | DQ582773 | FR264137 | DQ599273 | FR391104 | DQ603328 |
| FR121042 | DQ583065 | FR264146 | DQ582566 | FR391202 | DQ602396 |
| FR122387 | DQ552696 | FR264309 | DQ592953 | FR391349 | DQ599568 |
| FR123112 | DQ539904 | FR264314 | DQ603851 | FR391789 | DQ576603 |
| FR123582 | DQ577807 | FR264340 | DQ586779 | FR392315 | DQ588408 |
| FR124555 | DQ572897 | FR264718 | DQ575882 | FR392806 | DQ597747 |
| FR124762 | DQ587475 | FR265188 | DQ593407 | FR393002 | DQ599853 |
| FR125203 | DQ610426 | FR265415 | DQ579752 | FR393260 | DQ585139 |
| FR125634 | DQ571422 | FR266905 | DQ571524 | FR393552 | DQ570773 |
| FR125666 | DQ598639 | FR267761 | DQ596306 | FR394237 | DQ576872 |
| FR126206 | DQ541118 | FR268871 | DQ597916 | FR394529 | DQ595532 |
| FR127155 | DQ574748 | FR268922 | DQ601437 | FR395306 | DQ593049 |
| FR127491 | DQ597972 | FR269616 | DQ576544 | FR396016 | DQ580985 |
| FR127556 | DQ573061 | FR270274 | DQ585404 | FR396143 | DQ580927 |
| FR128508 | DQ571030 | FR270731 | DQ587153 | FR397592 | DQ704907 |
| FR129716 | DQ580653 | FR270793 | DQ540988 | FR397867 | DQ591554 |
| FR130009 | DQ603343 | FR271051 | DQ596486 | FR398335 | DQ576766 |
| FR130938 | DQ614004 | FR271147 | DQ596744 | FR398646 | DQ596079 |
| FR130984 | DQ571813 | FR271504 | DQ591919 | FR400187 | DQ604303 |
| FR131044 | DQ598428 | FR271550 | DQ614153 | FR400444 | DQ581887 |
| FR132045 | DQ588040 | FR271751 | DQ581033 | FR401197 | DQ578096 |
| FR132350 | DQ614631 | FR271797 | DQ591029 | FR402052 | DQ601646 |
| FR132358 | DQ570999 | FR272669 | DQ580131 | FR402099 | DQ717890 |
| FR132879 | DQ593744 | FR273550 | DQ586319 | FR402173 | DQ571511 |
| FR132977 | DQ581274 | FR273577 | DQ582218 | FR403087 | DQ614152 |
| FR133421 | DQ588486 | FR273668 | DQ587276 | FR403934 | DQ587756 |
| FR133661 | DQ576871 | FR274352 | DQ597110 | FR404484 | DQ597108 |
| FR134050 | DQ570812 | FR274916 | DQ716386 | FR404627 | DQ595292 |
| FR135586 | DQ579865 | FR274964 | DQ594916 | FR404900 | DQ577282 |
| FR135669 | DQ591464 | FR275181 | DQ718197 | FR405705 | DQ586711 |
| FR135938 | DQ577506 | FR275518 | DQ598998 | FR405784 | DQ587652 |
| FR136216 | DQ598104 | FR275856 | DQ571319 |          |          |

**Supplementary Table S3.** piRNA reads in the 24 frozen clear cell renal cell carcinoma (ccRCC) and benign kidney tissue samples by small RNA deep sequencing.

| Sample ID | Total small RNA (excluding piRNA) reads | piRNA reads | piRNA percentage |
|-----------|-----------------------------------------|-------------|------------------|
| E1        | 11317164                                | 419864      | 3.58%            |
| E2        | 12348778                                | 582951      | 4.51%            |
| E3        | 11842910                                | 474418      | 3.85%            |
| E4        | 7196921                                 | 754570      | 9.49%            |
| E5        | 14135897                                | 894154      | 5.95%            |
| E6        | 12194121                                | 677897      | 5.27%            |
| L12       | 9805446                                 | 463658      | 4.52%            |
| L13       | 11453799                                | 806333      | 6.58%            |
| L31       | 10477290                                | 445164      | 4.08%            |
| L7        | 11773145                                | 851122      | 6.74%            |
| L89-2     | 13720736                                | 998978      | 6.79%            |
| L91-2     | 13607239                                | 1050960     | 7.17%            |
| M13       | 14481545                                | 1005050     | 6.49%            |
| M16       | 10099853                                | 775543      | 7.13%            |
| M22       | 10819963                                | 554053      | 4.87%            |
| M2s_7     | 12519544                                | 1134072     | 8.31%            |
| M3        | 12255959                                | 793823      | 6.08%            |
| M4        | 10751495                                | 759288      | 6.60%            |
| N17_2     | 9928884                                 | 451757      | 4.35%            |
| N18       | 11587478                                | 549859      | 4.53%            |
| N27       | 14109222                                | 712948      | 4.81%            |
| N4_2      | 11055320                                | 665101      | 5.67%            |
| N43s_6    | 14433619                                | 775065      | 5.10%            |
| N7        | 11522012                                | 496391      | 4.13%            |

Note: N - benign kidney tissue, L - localized ccRCC, E - locally extensive ccRCC, and M - metastatic ccRCC.

**Supplementary Table S4A.** Small non-coding RNAs identified in the 4 formalin-fixed paraffin-embedded (FFPE) clear cell renal cell carcinoma (ccRCC) samples by small RNA deep sequencing.

| Sample | Total   | miRNA   | misc_RNA | Mt-tRNA | rRNA   | scRNA | snoRNA  | snRNA | tRNA    | Refseq | Intergenic |
|--------|---------|---------|----------|---------|--------|-------|---------|-------|---------|--------|------------|
| L12P   | 5457161 | 3138423 | 3008     | 25857   | 375174 | 39671 | 293364  | 33047 | 898250  | 237448 | 412919     |
|        |         | 57.51%  | 0.06%    | 0.47%   | 6.87%  | 0.73% | 5.38%   | 0.61% | 16.46%  | 4.35%  | 7.57%      |
| L31P   | 8157182 | 4903478 | 3629     | 31734   | 298064 | 43867 | 1157064 | 20596 | 676524  | 478115 | 544111     |
|        |         | 60.11%  | 0.04%    | 0.39%   | 3.65%  | 0.54% | 14.18%  | 0.25% | 8.29%   | 5.86%  | 6.67%      |
| N4P    | 5659848 | 2213688 | 4397     | 268505  | 691866 | 57461 | 343620  | 33126 | 1561946 | 245457 | 239782     |
|        |         | 39.11%  | 0.08%    | 4.74%   | 12.22% | 1.02% | 6.07%   | 0.59% | 27.60%  | 4.34%  | 4.24%      |
| N18P   | 5739583 | 2921844 | 3082     | 86455   | 458033 | 56145 | 780412  | 26355 | 828878  | 272346 | 306033     |
|        |         | 50.91%  | 0.05%    | 1.51%   | 7.98%  | 0.98% | 13.60%  | 0.46% | 14.44%  | 4.75%  | 5.33%      |

Note: N - normal kidney tissue, and L - localized ccRCC.

**Supplementary Table S4B.** piRNA reads in the 4 formalin-fixed paraffin-embedded (FFPE) clear cell renal cell carcinoma (ccRCC) samples by small RNA deep sequencing.

| Sample ID | Total small RNA (excluding piRNA) reads | piRNA reads | piRNA percentage |
|-----------|-----------------------------------------|-------------|------------------|
| L12P      | 5457161                                 | 686315      | 11.17%           |
| L31P      | 8157182                                 | 389951      | 4.56%            |
| N4P       | 5659848                                 | 436456      | 7.16%            |
| N18P      | 5739583                                 | 355885      | 5.84%            |

Note: N - normal kidney tissue, L - localized ccRCC.
